# Supplementary material for: Orthodenticle homeobox 2 is transported to lysosomes by nuclear budding vesicles
Source: PubMed Central journal article supplement (PMC9971051; doi:10.1038/s41467-023-36697-5), 2023-02-27
Supplement: 41467_2023_36697_MOESM2_ESM.pdf [file 41467_2023_36697_MOESM2_ESM.pdf]

## Reporting Summary

Nature Portfolio wishes to improve the reproducibility of the work that we publish. This form provides structure for consistency and transparency in reporting. For further information on Nature Portfolio policies, see our [Editorial Policies](#) and the [Editorial Policy Checklist](#).

### Statistics

For all statistical analyses, confirm that the following items are present in the figure legend, table legend, main text, or Methods section.

n/a | Confirmed

- The exact sample size ( $n$ ) for each experimental group/condition, given as a discrete number and unit of measurement
- A statement on whether measurements were taken from distinct samples or whether the same sample was measured repeatedly
- The statistical test(s) used AND whether they are one- or two-sided  
*Only common tests should be described solely by name; describe more complex techniques in the Methods section.*
- A description of all covariates tested
- A description of any assumptions or corrections, such as tests of normality and adjustment for multiple comparisons
- A full description of the statistical parameters including central tendency (e.g. means) or other basic estimates (e.g. regression coefficient) AND variation (e.g. standard deviation) or associated estimates of uncertainty (e.g. confidence intervals)
- For null hypothesis testing, the test statistic (e.g.  $F$ ,  $t$ ,  $r$ ) with confidence intervals, effect sizes, degrees of freedom and  $P$  value noted  
*Give  $P$  values as exact values whenever suitable.*
- For Bayesian analysis, information on the choice of priors and Markov chain Monte Carlo settings
- For hierarchical and complex designs, identification of the appropriate level for tests and full reporting of outcomes
- Estimates of effect sizes (e.g. Cohen's  $d$ , Pearson's  $r$ ), indicating how they were calculated

*Our web collection on [statistics for biologists](#) contains articles on many of the points above.*

### Software and code

Policy information about [availability of computer code](#)

Data collection

Data analysis

For manuscripts utilizing custom algorithms or software that are central to the research but not yet described in published literature, software must be made available to editors and reviewers. We strongly encourage code deposition in a community repository (e.g. GitHub). See the Nature Portfolio [guidelines for submitting code & software](#) for further information.

### Data

Policy information about [availability of data](#)

All manuscripts must include a [data availability statement](#). This statement should provide the following information, where applicable:

- Accession codes, unique identifiers, or web links for publicly available datasets
- A description of any restrictions on data availability
- For clinical datasets or third party data, please ensure that the statement adheres to our [policy](#)

## Human research participants

Policy information about [studies involving human research participants and Sex and Gender in Research](#).

|                             |                                   |
|-----------------------------|-----------------------------------|
| Reporting on sex and gender | <input type="text" value="None"/> |
| Population characteristics  | <input type="text" value="None"/> |
| Recruitment                 | <input type="text" value="None"/> |
| Ethics oversight            | <input type="text" value="None"/> |

Note that full information on the approval of the study protocol must also be provided in the manuscript.

## Field-specific reporting

Please select the one below that is the best fit for your research. If you are not sure, read the appropriate sections before making your selection.

Life sciences       Behavioural & social sciences       Ecological, evolutionary & environmental sciences

For a reference copy of the document with all sections, see [nature.com/documents/nr-reporting-summary-flat.pdf](https://nature.com/documents/nr-reporting-summary-flat.pdf)

## Life sciences study design

All studies must disclose on these points even when the disclosure is negative.

|                 |                                                                                                                                                                                                                                                                                                                                                                                                                                                                                                                              |
|-----------------|------------------------------------------------------------------------------------------------------------------------------------------------------------------------------------------------------------------------------------------------------------------------------------------------------------------------------------------------------------------------------------------------------------------------------------------------------------------------------------------------------------------------------|
| Sample size     | Sample sizes were determined based on previous study with similar experiments (Lee et al., 2019; <a href="https://doi.org/10.1016/j.celrep.2019.06.056">https://doi.org/10.1016/j.celrep.2019.06.056</a> ). Sample size information is provided in each figure legend. For quantifications from microscopy images, a minimum of n=50 cells were counted across sections although more cells were counted if available in the field of view. All results in this study were obtained from at least 3 independent experiments. |
| Data exclusions | <input type="text" value="None"/>                                                                                                                                                                                                                                                                                                                                                                                                                                                                                            |
| Replication     | For each experiment the number of independent sample is described in each figure legend. Independent experiments were performed at least 3 times.                                                                                                                                                                                                                                                                                                                                                                            |
| Randomization   | For in vitro experiment, samples were treated in random order. For animal experiment, littermate mice were randomly allocated to experimental and control groups, and mice were exposed to the same environmental condition.                                                                                                                                                                                                                                                                                                 |
| Blinding        | Sample selection and quantitative analyses of the data were done a blinded fashion, and the samples were matched after quantification.                                                                                                                                                                                                                                                                                                                                                                                       |

## Reporting for specific materials, systems and methods

We require information from authors about some types of materials, experimental systems and methods used in many studies. Here, indicate whether each material, system or method listed is relevant to your study. If you are not sure if a list item applies to your research, read the appropriate section before selecting a response.

### Materials & experimental systems

| n/a                                 | Involved in the study                                           |
|-------------------------------------|-----------------------------------------------------------------|
| <input type="checkbox"/>            | <input checked="" type="checkbox"/> Antibodies                  |
| <input type="checkbox"/>            | <input checked="" type="checkbox"/> Eukaryotic cell lines       |
| <input checked="" type="checkbox"/> | <input type="checkbox"/> Palaeontology and archaeology          |
| <input type="checkbox"/>            | <input checked="" type="checkbox"/> Animals and other organisms |
| <input checked="" type="checkbox"/> | <input type="checkbox"/> Clinical data                          |
| <input checked="" type="checkbox"/> | <input type="checkbox"/> Dual use research of concern           |

### Methods

| n/a                                 | Involved in the study                           |
|-------------------------------------|-------------------------------------------------|
| <input checked="" type="checkbox"/> | <input type="checkbox"/> ChIP-seq               |
| <input checked="" type="checkbox"/> | <input type="checkbox"/> Flow cytometry         |
| <input checked="" type="checkbox"/> | <input type="checkbox"/> MRI-based neuroimaging |

## Antibodies

|                 |                                                                                                         |
|-----------------|---------------------------------------------------------------------------------------------------------|
| Antibodies used | Detailed information on antibodies used in this study is provided in Supplementary Table 2.             |
| Validation      | All antibodies used in this study have been validated by the manufacturers for species and application. |

Validation information is available from the manufacturer's website.

α-Tubulin (B-7), Santa Cruz, Cat#: sc-5286  
<https://www.scbt.com/p/alpha-tubulin-antibody-b-7>  
 β-Actin (C4), Santa Cruz, Cat#: sc-47778  
<https://www.scbt.com/p/beta-actin-antibody-c4>  
 anti Calnexin (C5C9), Cell Signaling, Cat#: 2679  
<https://www.cellsignal.com/products/primary-antibodies/calnexin-c5c9-rabbit-mab/2679>  
 anti-Calretinin (clone 6B8.2), Sigma-Aldrich, Cat#: MAB1568  
<https://www.sigmaaldrich.com/KR/ko/product/mm/mab1568>  
 anti-CD63 (H5C6), Novus, Cat#: NBP2-42225  
[https://www.novusbio.com/products/cd63-antibody-h5c6\\_nbp2-42225](https://www.novusbio.com/products/cd63-antibody-h5c6_nbp2-42225)  
 anti-Cleaved Caspase-3 (Asp175), Cell Signaling, Cat#: 9661  
<https://www.cellsignal.com/products/primary-antibodies/cleaved-caspase-3-asp175-antibody/9661>  
 anti-EEA1, BD Biosciences, Cat#: 610456  
<https://www.bdbiosciences.com/en-au/products/reagents/microscopy-imaging-reagents/immunofluorescence-reagents/purified-mouse-anti-eea1.610456>  
 anti-EGF Receptor (D38B1), Cell Signaling, Cat#: 4267  
<https://www.cellsignal.com/products/primary-antibodies/egf-receptor-d38b1-xp-rabbit-mab/4267>  
 anti-Flotillin 1, Abcam, Cat#: ab41927  
<https://www.abcam.com/flotillin-1-antibody-ab41927.html>  
 anti-GFP (B-2), Santa Cruz, Cat#: sc-9996  
<https://www.scbt.com/p/gfp-antibody-b-2>  
 anti-GFP (1A5), Santa Cruz, Cat#: sc-101536  
<https://www.scbt.com/p/gfp-antibody-1a5>  
 anti-GM130 (EP892Y), Abcam, Cat#: ab52649  
<https://www.abcam.com/gm130-antibody-ep892y-cis-golgi-marker-ab52649.html>  
 anti-Histone H3, Abcam, Cat#: ab1791  
<https://www.abcam.com/histone-h3-antibody-nuclear-marker-and-chip-grade-ab1791.html>  
 anti-IGF-I (H-9), Santa Cruz, Cat#: sc-518040  
<https://www.scbt.com/p/igf-i-antibody-h-9>  
 anti-IGF-I Receptor β, Cell Signaling, Cat#: 3027  
<https://www.cellsignal.com/products/primary-antibodies/igf-i-receptor-b-antibody/3027>  
 anti-Lamin A/C (E-1), Santa Cruz, Cat#: sc-376248  
<https://www.scbt.com/p/lamin-a-c-antibody-e-1>  
 anti-Lamin A + Lamin C, Abcam, Cat#: ab108595  
<https://www.abcam.com/lamin-a--lamin-c-antibody-epr4100-nuclear-envelope-marker-ab108595.html>  
 anti-LAMP-2 (H4B4), Santa Cruz, Cat#: sc-18822  
<https://www.scbt.com/p/lamp-2-antibody-h4b4>  
 anti-LAMP-2/CD107b, R&D, Cat#: AF6228  
[https://www.rndsystems.com/products/human-lamp-2-cd107b-antibody\\_af6228](https://www.rndsystems.com/products/human-lamp-2-cd107b-antibody_af6228)  
 anti-LAP1B, Novus, Cat#: NBP2-47403  
[https://www.novusbio.com/products/lap1b-antibody\\_nbp2-47403](https://www.novusbio.com/products/lap1b-antibody_nbp2-47403)  
 anti-LC3B, Cell Signaling, Cat#: 2775  
<https://www.cellsignal.com/products/primary-antibodies/lc3b-antibody/2775>  
 anti-c-Myc (9E10), Santa Cruz, Cat#: sc-40  
<https://www.scbt.com/p/c-myc-antibody-9e10>  
 anti-Otx2 (EPR20375), Abcam, Cat#: ab183951  
<https://www.abcam.com/otx2-antibody-epr20375-ab183951.html>  
 anti-Otx2, R&D, Cat#: AF1979  
[https://www.rndsystems.com/products/human-otx2-antibody\\_af1979](https://www.rndsystems.com/products/human-otx2-antibody_af1979)  
 anti-p53 (FL-393), Santa Cruz, Cat#: sc-6243  
<https://www.scbt.com/p/p53-antibody-fl-393>  
 anti-Parvalbumin, Novus, Cat#: NB120-11427  
[https://www.novusbio.com/products/parvalbumin-antibody\\_nb120-11427](https://www.novusbio.com/products/parvalbumin-antibody_nb120-11427)  
 anti-RFP, Abcam, Cat#: ab62341  
<https://www.abcam.com/rfp-antibody-ab62341.html>  
 anti-SUN1, Novus, Cat#: NBP1-87396  
[https://www.novusbio.com/products/sun1-antibody\\_nbp1-87396](https://www.novusbio.com/products/sun1-antibody_nbp1-87396)  
 anti-Syndecan 3, Abcam, Cat#: ab36653  
<https://www.abcam.com/syndecan-3-antibody-ab36653.html>  
 anti-Nesprin-2, Sigma-Aldrich, Cat#: ABT182  
<https://www.sigmaaldrich.com/KR/ko/product/mm/abt182>  
 anti-Nesprin 2, Novus, Cat#: NBP1-84190  
[https://www.novusbio.com/products/nesprin-2-antibody\\_nbp1-84190](https://www.novusbio.com/products/nesprin-2-antibody_nbp1-84190)  
 anti-Tom20 (FL-145), Santa Cruz, Cat#: sc-11415  
<https://www.scbt.com/p/tom20-antibody-fl-145>  
 anti-Torsin A, Novus, Cat#: NBP2-95160  
[https://www.novusbio.com/products/torsin-a-antibody\\_nbp2-95160](https://www.novusbio.com/products/torsin-a-antibody_nbp2-95160)  
 anti-V (OASA04487), Aviva Systems Biology, Cat#: OASA04487  
<https://www.avivasysbio.com/v-antibody-oasa04487.html>  
 anti-Wisteria floribunda agglutinin, Sigma-Aldrich, Cat#: L1516  
<https://www.sigmaaldrich.com/KR/ko/product/sigma/l1516>

## Eukaryotic cell lines

Policy information about [cell lines and Sex and Gender in Research](#)

|                                                                      |                                                                                                  |
|----------------------------------------------------------------------|--------------------------------------------------------------------------------------------------|
| Cell line source(s)                                                  | HeLa (catalog #: CCL-2) cell line was obtained from the American Type Culture Collection (ATCC). |
| Authentication                                                       | None                                                                                             |
| Mycoplasma contamination                                             | Cell-lines used in this study was confirmed to be negative to mycoplasma contamination.          |
| Commonly misidentified lines<br>(See <a href="#">ICLAC</a> register) | None                                                                                             |

## Animals and other research organisms

Policy information about [studies involving animals](#); [ARRIVE guidelines](#) recommended for reporting animal research, and [Sex and Gender in Research](#)

|                         |                                                                                                                                                                                                                                                                                                                                                                                                                                                                                                                                                                                                                                                                                                                               |
|-------------------------|-------------------------------------------------------------------------------------------------------------------------------------------------------------------------------------------------------------------------------------------------------------------------------------------------------------------------------------------------------------------------------------------------------------------------------------------------------------------------------------------------------------------------------------------------------------------------------------------------------------------------------------------------------------------------------------------------------------------------------|
| Laboratory animals      | Tor1a $\Delta$ E/+ mice were purchased from the Jackson Laboratory (stock #: 025637).<br>LSL-KASH2 (Razafsky and Hodzic., 2014; <a href="https://doi.org/10.1002/dvg.22755">https://doi.org/10.1002/dvg.22755</a> ) and FoxJ1-CreER (Rawlins et al., 2007; <a href="https://doi.org/10.1073/pnas.0610770104">https://doi.org/10.1073/pnas.0610770104</a> ) mice were reported previously.<br>3-4 weeks old mice (C57BL/6 background) were used as described in this study.<br>All of the animals were maintained in a specific pathogen-free (SPF) facility of Korea Advanced Institute of Science and Technology (KAIST) under the 12-hour lights on/12-hour lights off cycle and at 22 $\pm$ 2°C and 50 $\pm$ 10% humidity. |
| Wild animals            | None                                                                                                                                                                                                                                                                                                                                                                                                                                                                                                                                                                                                                                                                                                                          |
| Reporting on sex        | Both male and female mice were used in this study.                                                                                                                                                                                                                                                                                                                                                                                                                                                                                                                                                                                                                                                                            |
| Field-collected samples | None                                                                                                                                                                                                                                                                                                                                                                                                                                                                                                                                                                                                                                                                                                                          |
| Ethics oversight        | All of the animals were handled according to approved institutional animal care and use committee (IACUC) protocols (#2012-37) of Korea Advanced Institute of Science and Technology (KAIST).                                                                                                                                                                                                                                                                                                                                                                                                                                                                                                                                 |

Note that full information on the approval of the study protocol must also be provided in the manuscript.
